# Supplementary material for: Enhanced understanding of atmospheric blocking modulation on ozone dynamics within a high-resolution Earth system model
Source: Copernicus journal article supplement (doi:10.5194/egusphere-2024-2500), 2024-09-18
Supplement: Supplementary file 1 [file egusphere-2024-2500-supplement.pdf]

1     Enhanced understanding of atmospheric blocking modulation on ozone  
2                   dynamics within a high-resolution Earth system model

3

4     Wenbin Kou<sup>1</sup>, Yang Gao<sup>1\*</sup>, Dan Tong<sup>2</sup>, Xiaojie Guo<sup>3,4</sup>, Xiadong An<sup>5</sup>, Wenyu Liu<sup>2</sup>, Mengshi Cui<sup>2</sup>,  
5                   Xiuwen Guo<sup>1</sup>, Shaoqing Zhang<sup>6</sup>, Huiwang Gao<sup>1</sup>, Lixin Wu<sup>6</sup>

6

7     <sup>1</sup>Frontiers Science Center for Deep Ocean Multispheres and Earth System and Key Laboratory of  
8     Marine Environmental Science and Ecology, Ministry of Education, Ocean University of China,  
9     and Laoshan Laboratory, Qingdao, 266100, China

10    <sup>2</sup>Department of Earth System Science, Tsinghua University, Beijing, 100084, China

11    <sup>3</sup>International Center for Climate and Environment Sciences, Institute of Atmospheric Physics,  
12    Chinese Academy of Sciences, Beijing, 100029, China

13    <sup>4</sup>University of Chinese Academy of Sciences, Beijing, 100049, China

14    <sup>5</sup>College of Oceanic and Atmospheric Sciences, Ocean University of China, Qingdao, 266100,  
15    China

16    <sup>6</sup>Frontiers Science Center for Deep Ocean Multispheres and Earth System, and Key Laboratory of  
17    Physical Oceanography, Ministry of Education, the College of Oceanic and Atmospheric Sciences,  
18    Ocean University of China, and Laoshan Laboratory, Qingdao, 266100, China

19

20                                   \*Correspondence to: [yanggao@ouc.edu.cn](mailto:yanggao@ouc.edu.cn)

21

22

23

24

25

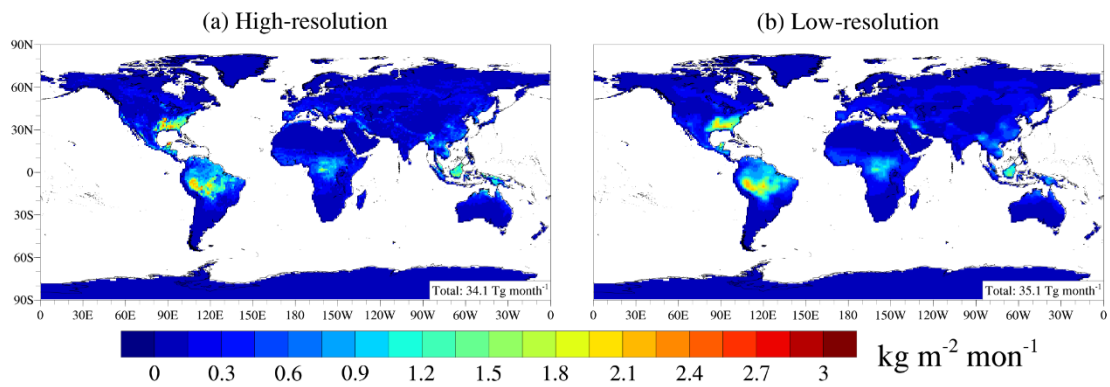

26

27 **Fig. S1 Spatial distribution of isoprene emissions.** Shown are results at high-  
 28 resolution ( $0.25^\circ \times 0.325^\circ$ ) and low-resolution ( $2^\circ \times 2.5^\circ$ ) simulations based on Weng et  
 29 al. (2020).

30

31

32

33

34

35

36

37

38

39

40

41

42

43

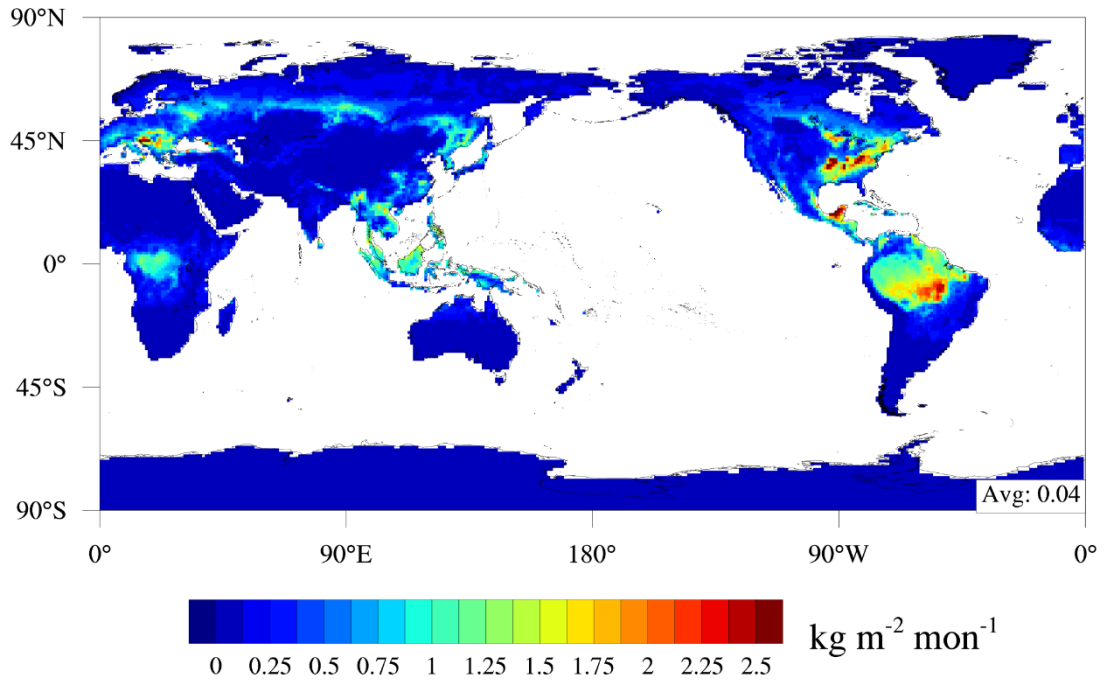

44  
45  
46  
47  
48  
49  
50  
51

**Fig. S2 Spatial distribution of isoprene emission standard deviation in the high-resolution simulations.** Shown are results equivalent to the low-resolution grids, with each value representing the standard deviation calculated using the proximately sixteen grids in high-resolution (i.e., 25 km) simulations corresponding to the low-resolution (i.e., 100 km) grid.

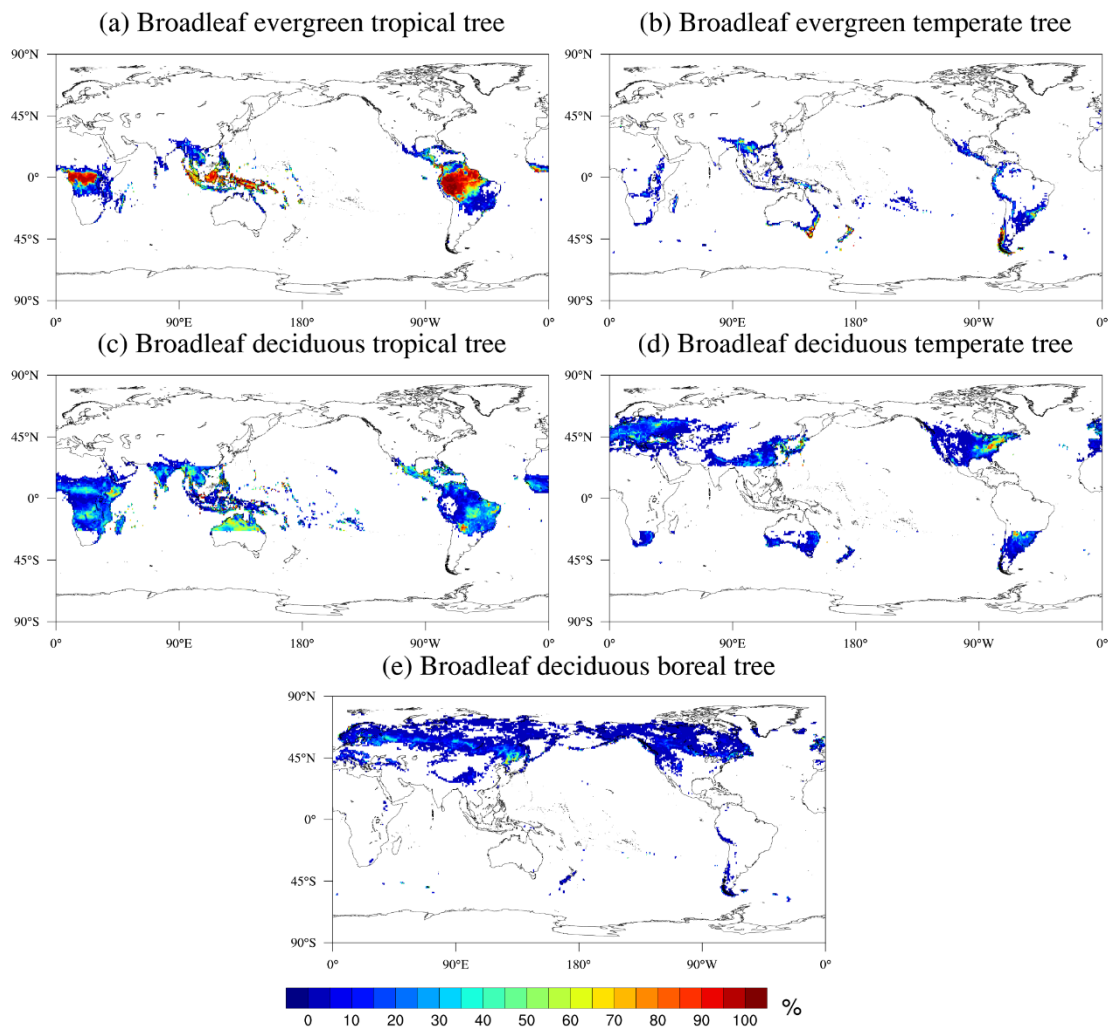

52

53 **Fig. S3 Spatial distribution of broadleaf trees (%) based on the plant type**

54 **functions used in global models.**

55

56

57

58

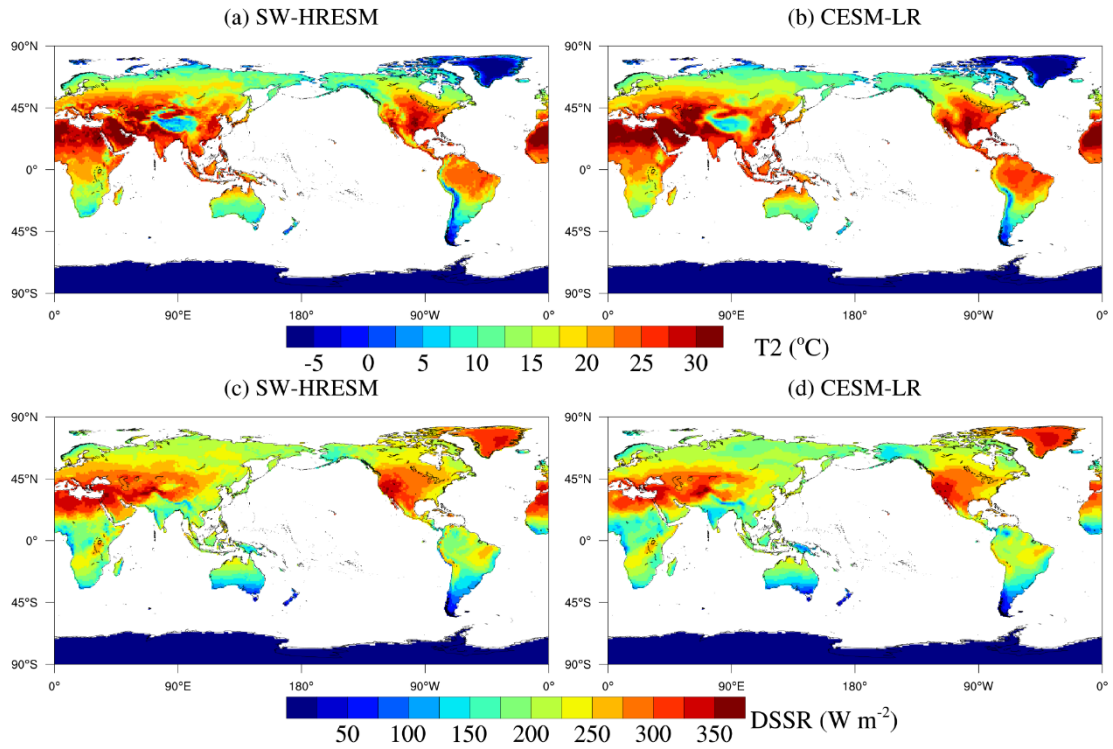

59

60 **Fig. S4 Spatial distribution of 2-m air temperature and downward surface solar**  
 61 **radiation.** Shown are results based on SW-HRESM and CESM-LR simulations during  
 62 the summer of 2015-2019

63

64

65

66

67

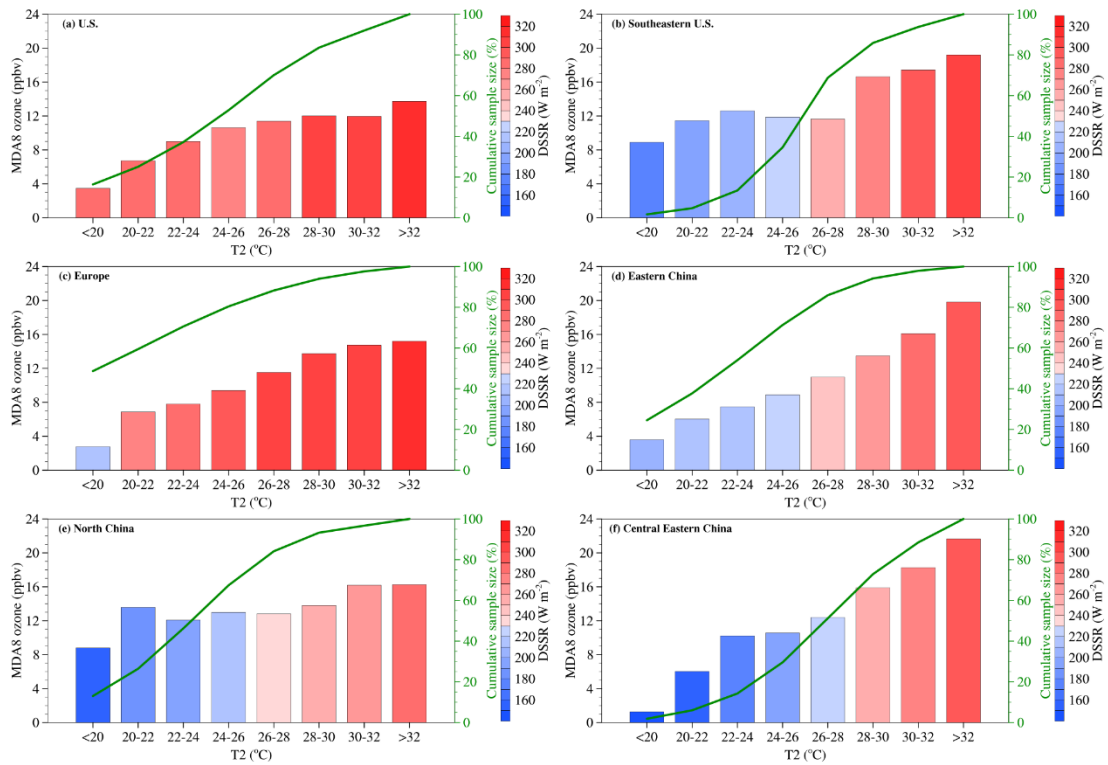

68

69 **Fig. S5 The contribution of biogenic volatile organic compound emissions to ozone.**

70 Shown are results along 2-m air temperature, with shaded color representing downward

71 surface solar radiation (DSSR) over six regions during the summers of 2015-2019. The

72 cumulative sample size over temperature bins is shown in the solid green line.

73

74

75

76

77

78

79

80

81

82

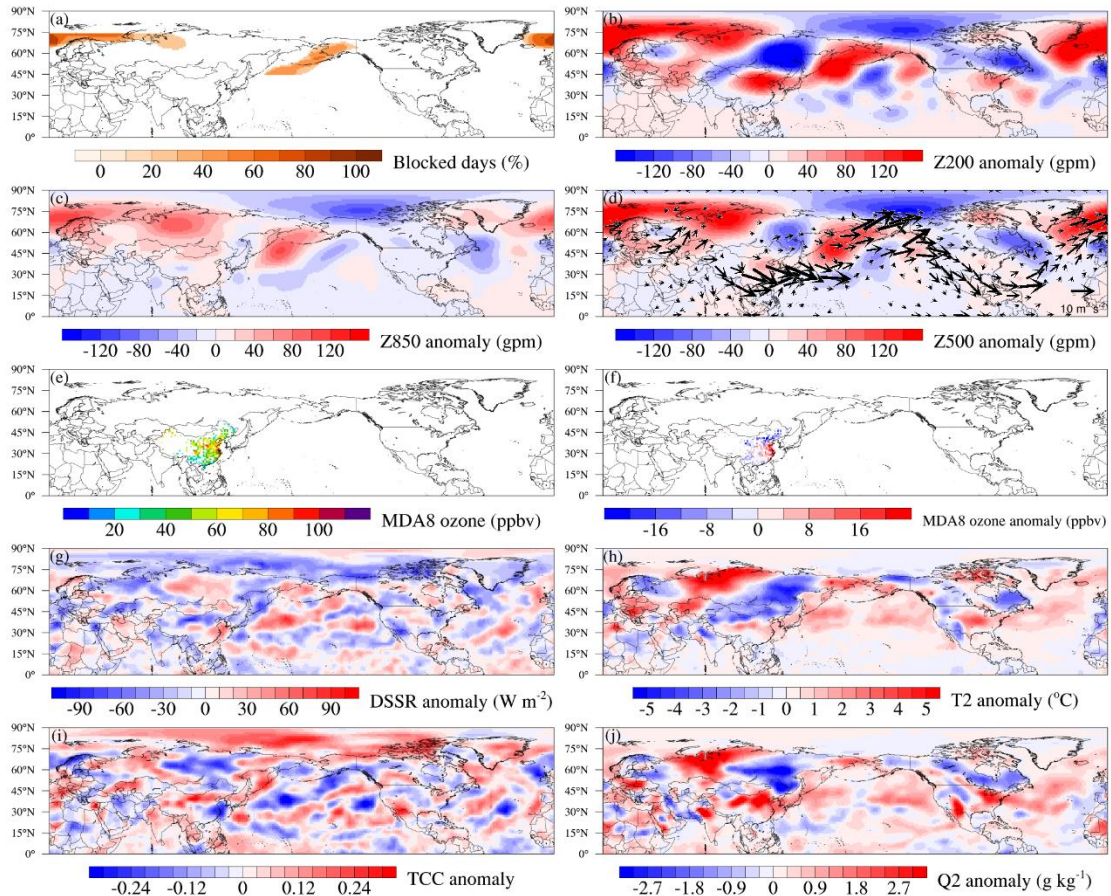

83

84 **Fig. S6 Spatial distribution of blocking, ozone and geopotential height.** Shown are  
 85 results of anomalies of geopotential height at (b), 200 hPa, (c) 850 hPa, (d) 500 hPa, (e)  
 86 ozone concentrations, anomalies of (f) ozone, (g), DSSR, (h) 2-m air temperature, (i)  
 87 total cloud cover and (j) 2-m specific humidity. The results are composited during a  
 88 specific blocking event over Euro-Atlantic region.

89

90

91

92

93

94

95

96

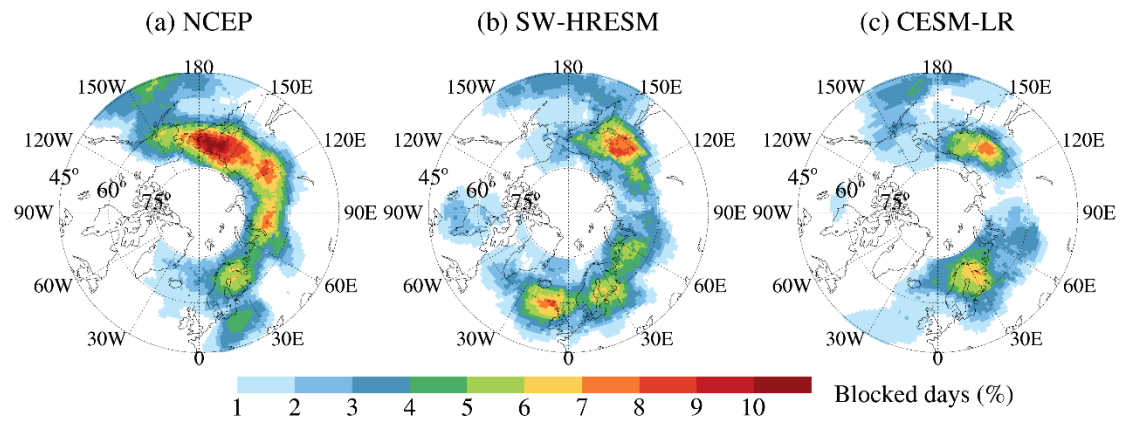

97

98 **Fig. S7** Mean ratio of atmospheric blocking days based on SW-HRESM and CESM-  
 99 LR simulations and NCEP reanalysis data during the summer of 2015-2019.

100

101

102

103

104

105

106

107

108



(a) Ozone during non\_BL (BASE)

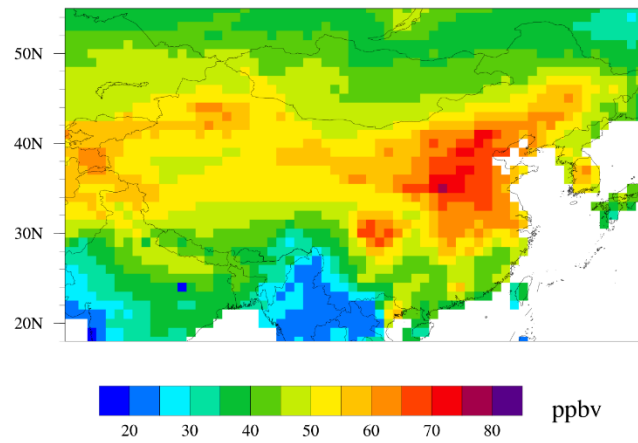

(b) Ozone due to BVOC (non\_BL)

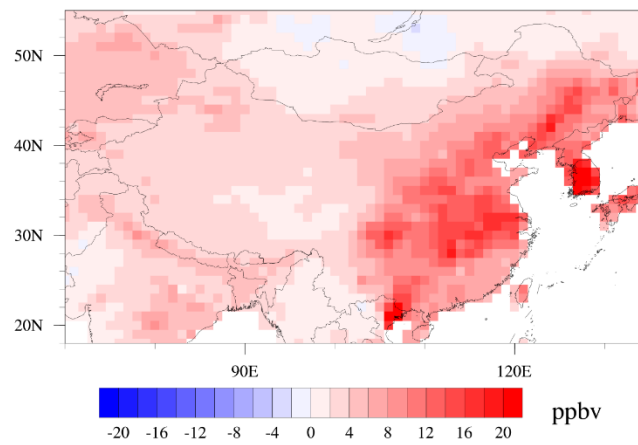

109

110 **Fig. S8 Spatial distributions of ozone concentrations.** Shown are results during non-

111 blocking for (a) BASE and (b) effect of BVOC emissions.

112

113

114

115

116

117

118

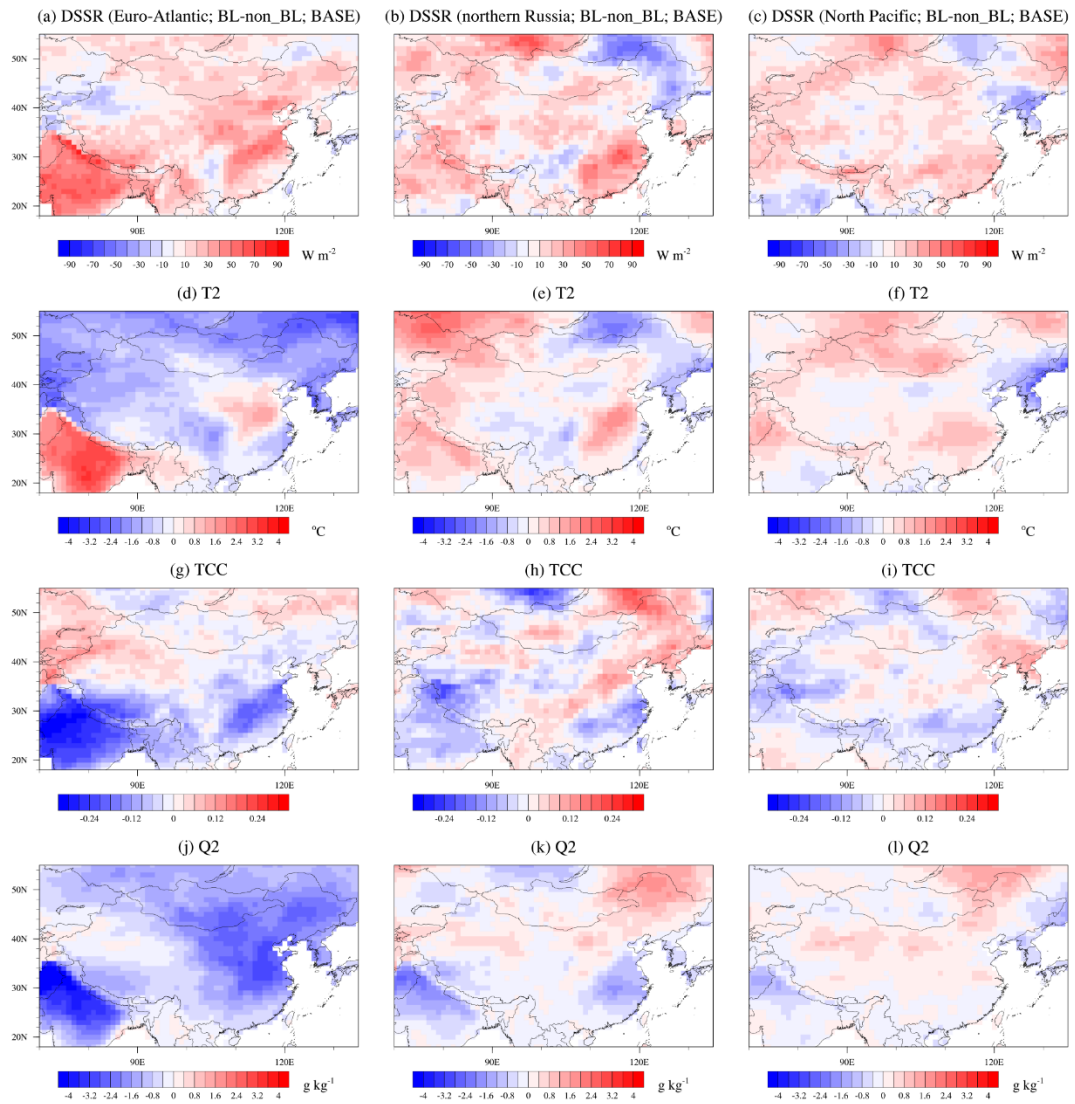

119

120 **Fig. S9 Spatial distribution of meteorological conditions.** Shown are the differences  
 121 in DSSR (top row), 2-m air temperature (second row), total cloud cover (third row) and  
 122 2-m specific humidity (bottom row) during blocking events over Euro-Atlantic (left  
 123 column), northern Russia (middle column) and the North Pacific (right column)  
 124 compared to non-blocking periods.

125

126

## Ozone due to BVOC (BL - T<26)

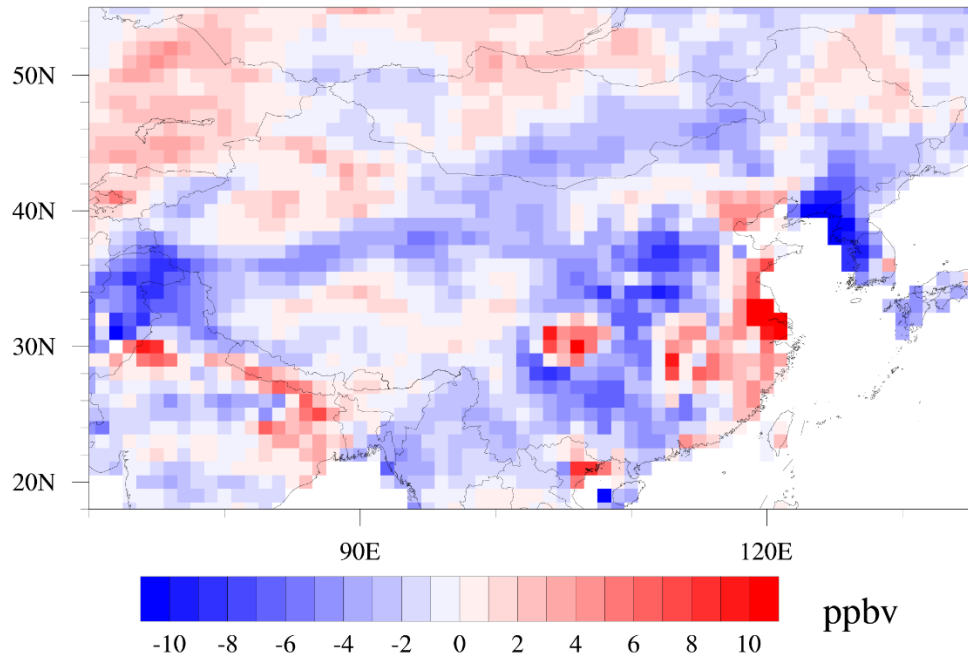

127

128 **Fig. S10 Spatial distributions of ozone concentrations.** Shown are results of the

129 differences in the effects of BVOC emissions on ozone during blocking events over

130 northern Russia, compared to periods with 2-m air temperature below 26 °C.

131
